# Supplementary material for: A Pilot Study of an Adaptive, Idiographic, and Multi-Component Attention Bias Modification Program for Social Anxiety Disorder
Source: Springer Nature journal article supplement (doi:10.1007/s10608-016-9781-1), 2016-05-07
Supplement: MOESM1 [file 10092598]

**Supplemental Material: Expanded Description of the AABM Program**

The program was a modified spatial cueing task (Amir, Elias, Klumpp, & Przeworski, 2003; Koster, De Raedt, Goeleven, Franck, & Crombez, 2005; Posner, 1980). We implemented all software development in Embarcadaro Studio X2 (<http://www.embarcadero.com>). The program had two phases, practice phase and training phase. The practice phase was designed to familiarize participants with the program while gradually introducing more attentionally demanding elements (e.g., flanking letters); the training phase directly targeted an increase in positive attentional bias and a decrease in negative attentional bias.

During each trial a fixation cue appeared in the center of the screen (500ms) alerting the participants to the beginning of a trial. The fixation cue then disappeared and a single word appeared either above or below the fixation cue directing attention to that location. The word then disappeared and a probe appeared (either the letter ‘E’ or the letter ‘F’). Participants pressed a corresponding mouse button indicating whether the letter was an E or an F. Each word was one of 15 (5 negative, 5 positive, and 5 neutral) ideographically selected words. Specifically, participants were given the following instructions for each word category: “come up with 5 words that are unequivocally (negative/positive/neutral) for you, that is, no matter when you think of these words, they mean something (negative/positive/neutral) for you.” Participants were presented with a -3 (disturbing) to +3 (pleasant) valence rating scale and asked to identify negative words that they would rate as -3, positive words that they would identify as a +3, and neutral words that they would identify as 0. These words were selected with the assistance of the assessing clinician. Negative words were typically suggested based on content described by the participant during the interview as primary concerns (e.g., “rejection” “interview”). The negative words always served as invalid cues (i.e., the probe always appeared in the location opposite the location of the negative word), and the positive words always served as valid cues (i.e., the probe always appeared in the same location as the positive word). The neutral words could serve as either a valid cue or an invalid cues with equal frequency (i.e., the location of the neutral word was not informative about the location of the probe).

Each session of the program comprised 360 trials, 1/3 neutral words, 1/3 positive words, and 1/3 negative words. Thus, there were 120 trials with neutral words: 5 (words) X 2 (word position) X 2 (probe position) X 2 (probe type) X 3 (repetition); 120 negative trials: 5 (words) X 2 (word position) X 2 (probe type) X 6 (repetition); and 120 positive trials: 5 (words) X 2 (word position) X 2 (probe type) X 6 (repetition).

Prior to initiating the task, we provided participants a one page training sheet for the AABM. These instructions included both explicit instructions (i.e., the contingency between word valence and probe location) and training goal (i.e., what attentional bias is, different components of attentional bias, and how the program helps modify it). We then asked participants comprehension questions in order to ensure that the concepts were clear and answered any participant questions. These instructions were reinforced further by providing popup windows during the training as new features were added. For example, after level 20 (approximately 140 trials, depending on participant accuracy see below) a pop up window appeared informing participants that now the probe would be flanked with two letters on each side and that their task remained the same: to focus on and identify the centrally located letter.

**Practice phase**. During the practice phase (levels 0-29), participants increased in levels by performing accurately during the task such that after 7 consecutive trials where they correctly identified the probe they moved to the next level of the program. We chose the number 7 in order to ensure that participants remained accurate while also remaining engaged in the task and avoiding frustration. This number ensured a minimum of 203 correct trials (7 trials * 29 levels) in the practice phase, thus allowing sufficient time for participants to become accustomed to the task prior to beginning the training phase. Making a mistake (incorrect trials) reset the counter such that they would have to obtain seven consecutive correct trials in order to reach the next level. The practice phase was designed to familiarize participants to the procedure of the AABM and prepare them for the training phase. We gradually increased the difficulty of the program during the practice phase through: 1) using color of fixation cue to predict probe location at beginning, and gradually fading the color of the cue for emotional (i.e., positive and negative) words, and 2) flanking the probe beginning with level 20 in order to increase attentional demand.

***Explicit trial-level instructions: From cue color to emotional word meaning.*** During the beginning of the practice phase, in order to facilitate selective attention to spatial locations on the screen that predicted the location of the cue, we used different colors for the fixation cues (Hutton & Ettinger, 2006). Specifically, we informed participants that green cues always predicted valid trials (i.e., the probe would be in the same location as the cue) and that red cues always predicted invalid trials (i.e., the probe would be in the opposite location as the word). That is, the cue provided information about the contingency between the location of the word to follow and the location of the probe letter (see Fig. 1). Thus, the color of the cue served as an explicit instruction for participants on each trial. We provided this information consistently during the first 10 levels of the program.

Beginning at level 10 we began to transfer the location information from the color of the cue to the meaning of the emotional (i.e., positive and negative) words. To this end, a popup window informed participants that the color of the fixation cue would begin to fade for emotional words and that they should use the valence of the emotional word as a guide for location of the cues. This allowed a transfer of information about the type of trial (valid or invalid) from the fixation cue (green or red) to the meaning of the emotional words (positive or negative). The fixation cue color for emotional trials gradually faded from color (red or green) to white, at each level after level 10 by 25% color intensity such that the color of the fixation cue became completely white at level 14. Thereafter, for emotional trials, word valence served as the only predictor of probe location, while for neutral trials, the color of the fixation cues (green or red) remained a predictor of probe location throughout the training. Thus, using color first and emotional valance thereafter, we were able to reinforce the explicit instruction at the beginning of training that cues about spatial location were useful in progressing through the program. However, the neutral trials had an advantage over emotional words as they were always cued with color fixation.

***Using flankers to increase attentional demand.*** The probe used in the AABM comprised a single letter during the first 20 levels of the program. However, beginning with level 21 (trial number 140 approximately) a popup window informed participants that the probe would now comprise a series of 5 letters (all 5 letters would comprise the letters E and/or F). We informed participants that this would make the task more demanding but that their task remained the same: to identify the centrally located letter and to ignore the two letters flanking it to the right and the two letters flanking it to the left. On flanked trials the flanking letters were either congruent with the center letter probe (e.g., "EEEEE") or the flanking letters were incongruent with the center letter probe (e.g., "FFEFF"). The practice phase ended at level 30 (trial number 210 approximately) and included the above described features.

**Bias training phase.** At the beginning of the formal attentional bias training phase (levels 30 and higher), a popup window informed participants that they would now move through the levels of the program by either (a) increasing their positive attentional bias, or (b) decreasing their negative attentional bias. Specifically, either a decrease in negative bias (1 ms) or an increase in positive bias (1 ms) would increase their level in the game (see below for definition of bias). Thus, the AABM was designed to advance in levels when participants were successful in manipulating their attention away from threat and towards positive. The popup window further informed them that if they have reached the training phase, they had sufficient practice and their goal was to modify their attentional bias with the assistance of levels as feedback showing how their attentional biases were changing.

We defined and created a positive bias score by subtracting average response latency for positive valid trials (probes replaced valid positive words) from average response latency for neutral valid trials (probes replaced valid neutral words). Thus, higher positive bias indicated faster engagement towards positive cues compared to neutral cues. On each relevant trial (either valid positive or valid neutral) we updated the positive bias score using all trials up to that point (i.e., cumulative average). If this bias score increased by 1 ms from one trial to the next, participants moved up one level. Thus, higher levels indicated relative speeding of valid positive word cues when compared to valid neutral word cues, and an increase in positive bias indicated faster responding to positive valid cues when compared to neutral valid cues.

Similarly, we defined negative bias by subtracting the average response latency for neutral invalid trials (probes following neutral words in the opposite location as the word) from the average response latency for negative invalid trials (probes following negative words in the opposite location). A lower negative bias indicated faster disengagement from negative cues compared to neutral cues. On each relevant trial (either invalid negative or invalid neutral) we updated the negative bias score using all trials up to that point (i.e., cumulative average). If this bias score decreased by 1 ms from one trial to the next, participants moved up one level. Thus, lower scores on negative bias indicated relative speeding for invalid negative word cues when compared to invalid neutral word cues, and a decrease in negative bias indicated faster responding to negative invalid cues when compared to neutral invalid cues.

Finally, we calculated an attentional control score by subtracting average response latency for probes following neutral invalid words from average response latency for probes following neutral valid words. Thus, higher attentional control scores indicated faster engagement to the cues in the same location as the probe when compared to probes in the opposite location as the word.

At the end of each session, a popup window showed participants the level they had reached. In addition, participants had the option to view their positive bias, negative bias, and attentional control and current level in a small window on the computer screen throughout the course of the program as a real-time feedback. The program also plotted the trajectories of positive bias and negative bias in real time, and these plots could also be reviewed on the screen.

***Recalibration.*** Because increase in level required either a 1-point decrease in negative bias or increase in positive bias, it became progressively more challenging to advance in levels as participants moved through the program (i.e., larger number of trials contributing to cumulative average). As the program was adaptive and depended on the participants’ performance to move to higher levels, it was possible for the program to become frustrating if the intended change in bias did not occur (i.e., neither positive bias would increase nor would negative bias decrease) over many trials. To ensure that participants remained engaged in the task and increase the chance that bias would improve, we included a recalibration feature in the program. During bias training phase, if participants completed 100 trials without an increase in level, a popup window informed participants that they could either (a) take a break or (b) recalibrate. If the participants chose to recalibrate, we reset their best bias levels for both positive and negative scores to their current level. This lowered the difficulty of the program if progress did not occur after 100 trials.

We reasoned that lack of change in bias may be due to the participants reaching a local minimum (in negative bias) or local maximum (in positive bias). More specifically, we reasoned that the level of negative bias over time would have a global (or absolute) minimum point. However, negative bias would also have a local minimum at the point. In such cases where subjects were at local minimum and therefore not able to change their bias over time, we reset the bias to the current level to the lowest level of bias ever reached in the game, therefore allowing further improvement in the game. We reasoned that there were several situations where a participant can reach a local minimum (negative bias) or local maximum (positive bias) including fatigue and distraction. Recalibration serves as a tool to reduce the effects of these situations on the training.

***Cumulative training.*** Participants completed this task over multiple training sessions (see *Procedure* below). At the end of each AABM session, the program automatically saved the participant’s data as a game file with information about the participant’s response latency profile, negative bias, positive bias, attention control, and last level reached. Thus, if a participant ended a session at level 53, then they would simply re-load their existing game at the next session and start at level 53, progressing in level based on improvement upon last saved positive or negative attentional bias scores. Thus, participants only completed the practice phase of the task during their first training session.
